# Supplementary material for: Multidecadal satellite-derived Portuguese Burn Severity Atlas (1984–2022)
Source: Copernicus journal article supplement (doi:10.5194/essd-2024-305), 2024-08-01
Supplement: Supplementary file [file essd-2024-305-AC1-supplement.pdf]

## Reviewer #1

The present study is concerned with the multidecadal satellite-derived Portuguese Burn Severity Atlas. The authors offer valuable insights into the topic. The authors present the following observations for consideration.

We thank the reviewer for their feedback and comments.

1. It is my contention that the role of small fires in the context of wildfire management is a significant yet understudied area. In contrast, the current study has a narrow focus on large fires (>100 ha).

We thank the reviewer for their insight. We focused on large fires ( $\geq 100$  ha) because these correspond to the majority of area burned in Portugal. As stated by Fernandes et al 2009 and records from Divisão de Defesa da Floresta Contra Incêndios (DGRF), large fires correspond to only 1% of all fires but correspond to 75 % of the total burned area (mentioned in the manuscript in sub-section “2.1 Fire Data” lines 129 and 131). Concurrently, in our study, 37 % of all the recorded fires (1984 -2022) had no burn severity estimates:

- 25 % corresponded to pre-2000 fires smaller than 500 ha and/or with no recorded dates
- 10 % corresponded to post-2001 fires smaller than 100 ha and/or with no recorded dates
- 2 % corresponded to lack of satellite imagery.

These aspects are mentioned in the section “4 Discussion” lines 399 to 404.

In addition, as there are a lot of small fires throughout the years in Portugal, accurate fire data has not been recorded for all fires. This fact is unfortunately worse for historical fires as we were not even able to find dates for pre-2000 fires between 100 ha and 500 ha and due to the large difference between fire and image acquisition date (introduced as time lag throughout the manuscript), we were forced to only consider fires large than 500 ha for this duration (this point is mentioned in the sub-section “2.1 Fire data” in lines 149 and 150).

As our methodology can be applied to smaller fires (<100 ha), we consider our focus only on large fires as a limitation of our study, which in future studies can be explored. Hence, the need for burn severity analysis of smaller fires is mentioned in the section “4 Discussion” in lines 404 to 406. The added point in the revised version is as follows:

Within this study, the focus was on large fires ( $\geq 100$  ha), however, this can be considered as a limitation of our atlas. As our developed methodology can be applied to smaller fires (<100 ha), the exploration of burn severity of small fires can be a research opportunity for future studies.

2. It is anticipated that the fire atlas will have an identical resolution, resulting in comparable outcomes at either 30 or 500 meters. It is recommended that the ALI sensor be used for the 2012 data set.

We thank the reviewer for their suggestion. We agree that it would have been ideal for the atlas to have identical resolution (preferably 30 m) throughout the years. Aside from the Landsat series, images from Earth Observation-1 Advanced Land Imager (hereafter as EO-1 ALI) would have been the best option considering the spatial resolution. However, we have not created the atlas by manually gathering and processing the images, instead we have used “Google Earth Engine” and created a semi-automated process to gather, select, process, and calculate the burn severity estimates. Unfortunately, the EO-1 ALI dataset is not available on Google Earth Engine.

Moreover, although EO-1 ALI sensor had the capability of having global coverage, it was an experimental satellite and mission-based, hence, it did not have continuous and frequent imaging with global coverage

like Landsat series of sensors. Thus, the number of images available over Portugal throughout the years is scarce with total number of available images of 52 which all were captured before 2012 (only from 2002 to 2011 (<https://earthexplorer.usgs.gov/>)).

As 112 large fires occurred in 2012 with the approximate extent of 81000 ha, there are not any available EO-1 ALI images. Nonetheless, manually gathering and processing images would be time consuming and is beyond the scope of the work. Hence, we decided to apply images from Terra aboard Moderate Resolution Imaging Spectroradiometer (MODIS) with a resolution of 500m for 2012.

This point has been added in the section “4 Discussion” in lines 440 to 451 as follows:

This objective was achieved for all years except for 2012 for which images from MODIS Terra were applied which has caused Portuguese burn severity atlas not to have consistent spatial resolution throughout all the years. This aspect is a limitation of the atlas. According to Landsat sensors’ availability dates (Table1), no images from this family of sensors were available for this year aside from Landsat-7 ETM+ with SLC failure. One possible alternative would be to use images from Earth Observation-1 Advanced Land Imager (hereafter EO-1 ALI) available from November 2000 to March 2017 with a spatial resolution of 30 m (Chander et al., 2009). Although EO-1 had the capability of imaging with global coverage, it was an experimental and mission-based satellite (Hoang and Koike, 2018) and via accessing the website (EarthExplorer, 2025), it was observed that there are only 52 images available form this sensor with coverage of Portugal’s mainland, and all were captured before 2012 (from 2002 to 2011). Hence, to have temporal consistency, images from MODIS Terra were applied for 2012. According to by Alonso-González and Fernández-García, 2021, the burn severity estimates obtained by Landsat and MODIS are comparable despite the big difference in their resolution and to evaluate their comparability, their developed methods can be applied (Alonso-González and Fernández-García, 2021).

3. It is my contention that a burn severity mapping system based solely on these indices with a fixed threshold will not yield optimal results. The resulting burn severity map is an inaccurate representation of the landscape due to the influence of environmental conditions, the diversity of objects, and the impact of climate.

We thank the reviewer for this comment. All our maps are presented in their continuous forms and no fixed threshold and classification have been applied on them. We have specified this point in the section “4 Discussion” lines 530 and 531.

We only presented the thresholds assigned by European Forest Fire Information Service (hereafter EFFIS) as an example of interpretation means to facilitate interpreting the maps by users if needed. However, means of interpretation must only be aligned by the users’ objectives. We have emphasized this point in the section “4 Discussion” in lines 516 to 518. Moreover, we have specified in the section “4 Discussion” lines 511 to 512, that any means of interpretation must be accompanied by field observations and users are required to take “caution” using any predefined means of interpretation. The reason for this caution is also added as follows in in the section “4 Discussion” lines 512 to 515:

This is crucial because burn severity often varies across vertical strata, and satellite-derived reflections are differently sensitive to impacts at each layer. Aggregating these impacts into a single metric can obscure important ecological details (Fernández-Guisuraga et al., 2023a; Miller and Thode, 2006; Parks et al., 2014; Cansler and McKenzie, 2012).

This point must also be highlighted that the fixed thresholds by EFFIS are provided based on the comparison that they made between dNBR pixel values and ground burn severity assessment in the Mediterranean regions, considering the dominant environmental and climate conditions within these regions.

This point will be added in the section “4 Discussion” in lines 518 to 522.

The added point is as follows:

As an example of means towards interpretation of burn severity, in this study, the thresholds assigned by EFFIS are mentioned. The thresholds of EFFIS are assigned only for dNBR index and not for other indices and they are obtained from the comparison between dNBR pixel values and ground burn severity estimates considering the dominant environmental and climatic conditions within the Mediterranean regions (Llorens et al., 2021).

4. It is anticipated that the reliability of the atlas dataset will be enhanced by the incorporation of a more robust validation dataset.

We thank the reviewer for their comment. We have not used any “validation dataset” as we emphasized that no ground burn severity assessment was performed and no data in this regard were included nor analyzed (mentioned in the section “4 Discussion” in line 516). All these maps are estimations of burn severity and to assess their validity, they must be accompanied by ground burn severity assessment. The scope of this work does not include any validation.

There are multiple studies in which the validation of different burn severity indices used in this atlas have been performed and they are mainly focused on different parts of the USA as mentioned in the section “4 Discussion” lines 522 to 534.

Example of other studies with their focus on the Mediterranean regions will be added in the section “4 Discussion” lines 530 to 538. However, these studies are isolated and limited and hence, they cannot be incorporated on large scale, which in our case is the mainland of Portugal (e.g., the study performed by Fernández-García et al (2022) considering the total number of 23 fires among which only 4 fires were located in Portugal). While lack of validation is a limitation in our study, as a suggestion for future studies, this point will be also mentioned that the conduction of such analysis is encouraged. These added points will be in the section “4 Discussion” lines 524 to 532.

The added points are as follows:

In Spain and specifically in Valencia province, by comparing CBI and dNBR, RdNBR, and RBR, the classification thresholds for interpretation of these indices have been introduced (Botella-Martínez and Fernández-Manso, 2017), which were furthered utilized for interpretation of burn severity estimates by ICNF for fires which burned in Monchique and Portimão in Portugal (Anon, 2021). Moreover, there is a study conducted by Fernández-García et al (2022) considering the total number of 23 fires among which only four fires were located in Portugal (Fernández-García et al., 2022). Although there are studies comparing burn severity observations with estimates, they are isolated and limited and hence, they cannot be incorporated on large scale, which in our case is the mainland of Portugal. Hence, our maps have all been presented in their continuous raw forms and no classifications have been applied to them. We acknowledge the lack of validation as a limitation of our atlas and we encourage conduction of future studies to validate the burn severity estimates of Portuguese Burn Severity Atlas.

5. It would be beneficial to examine the influence of seasonality and the climate dataset on the severity map.

We thank the reviewer for their suggestion. The analysis of burn severity drivers including climate variables was not within the scope of this study, while strongly encouraged by us to be performed in future studies. Our main goal is to provide users with burn severity estimates as a necessary foundation enabling future studies to perform all sorts of analysis specifically on the correlation of burn severity and the drivers (both top-down and bottom-up).

“Seasonality” as a burn severity driver was not explored as it was not within the scope of this study. However, the influence of “seasonality” on the quality of burn severity estimates, has been briefly explored as we have pointed out its role for instance by causing “mismatched phenology” between pre- and post-fire images (mentioned in the section “4 Discussion” within lines 470 to 481), while it was not quantified.

Instead, we focused on the variation of the time lag and modelled it. Moreover, we tried to minimize the influence of the seasonality by capping the image acquisition sampling period, i.e., the duration to acquire satellite images, to  $\pm 120$  days. By the analysis of the time lag variation from the first to fourth iterations, it was observed that the time lag on average does not exceed  $\pm 50$  days (the corresponding result is presented in Figure B1 in the Appendix B section). However, the difference in seasonality may still have occurred and to minimize this impact, we have also calculated the burn severity offset values for all the indices and if the users are concerned with the seasonality variation, they can apply the offset values. Via the calculated offset values and comparing them to the time lag, the influence of seasonality can be also quantified. As the conduction of such analysis is encouraged by us, this point is added to “Discussion” section in lines 479 to 481. The added point is as follows:

Moreover, as suggestion for future studies, the lack of knowledge in the degree of seasonality influence on quality of burn severity estimates can be highlighted that via the offset values provided in the atlas and comparison between them and time lag such analysis can be conducted.

6. It would be advantageous to include the severity of different objects and trees during the fire period.

We thank the reviewer for their suggestion. Within this atlas, we applied images from the Landsat series of sensors with a resolution of 30 m. Hence, each pixel value corresponds to average reflectance of an area equivalent to 0.09 ha. Hence, distinguishment of burn severity of different land cover species and degree of burn severity of trees such as “crown damage” or “complete crown consumption” or in other words burn severity heterogeneity of different land cover types is not possible as this is a consistent limitation in capabilities of current sensors.

#### **Minor comments:**

1. It is recommended that all figures be enhanced in terms of quality.

We thank the reviewer for their comment. We will update the manuscript with higher quality figures. Moreover, in the revised version of the manuscript, the legend of Figure 5 was changed to “1<sup>st</sup> iteration (representing the blue boxplots).

2. It would be helpful to include a map indicating the frequency of burn for different areas.

We thank the reviewer for their suggestions. A figure is added to the Appendix A as Figure A1 to show frequency of fires – both all and valid fires- within the parishes and districts of Portugal. Reference to this figure was added in the sub-section “2.1 Fire data” in lines 162 to 165. The added point is as follows:

To have an overview on the frequency of fires within the mainland of Portugal, FigA1 is provided in the Appendix. The frequencies of fires in Northern and Central regions are higher in comparison to other regions based on level 3 “Nomenclature of Territorial Units for Statistics” (presented as NUTS3) frontiers classification (Registo Nacional de Dados Geográficos - Direção-Geral do Território (DGT), 2024; Meneses et al., 2018).

3. It would be beneficial to analyze the impact of the threshold value for different sensors on the same fire.

We thank the reviewer for their suggestion. As Landsat sensors' availability dates do not overlap (Table 1), it is not possible to have burn severity estimates for one fire via images acquired from different sensors. Hence, although this analysis would have been indeed beneficial, its performance is not possible.

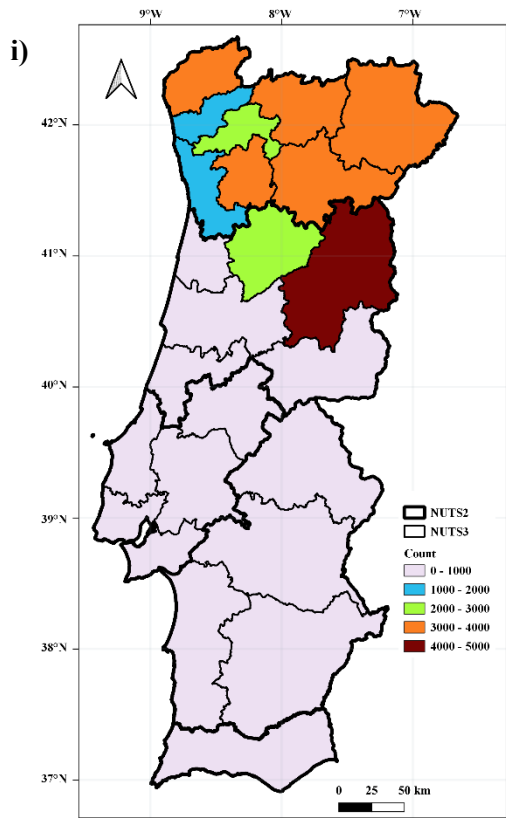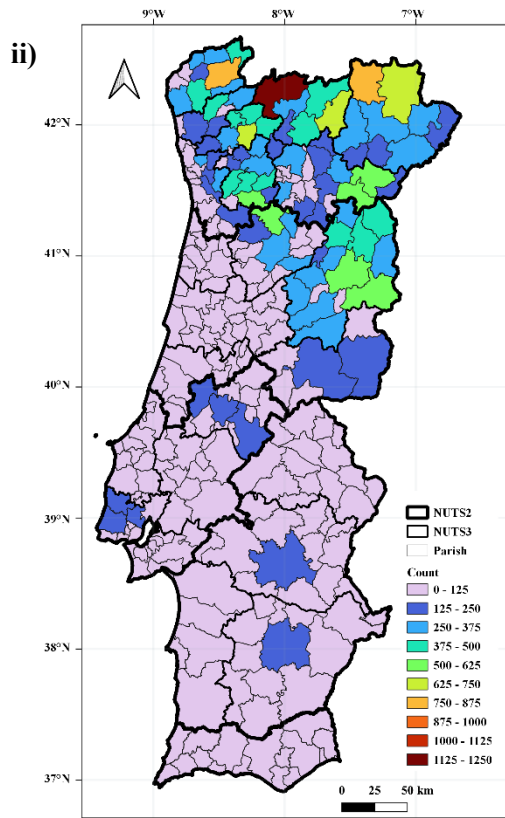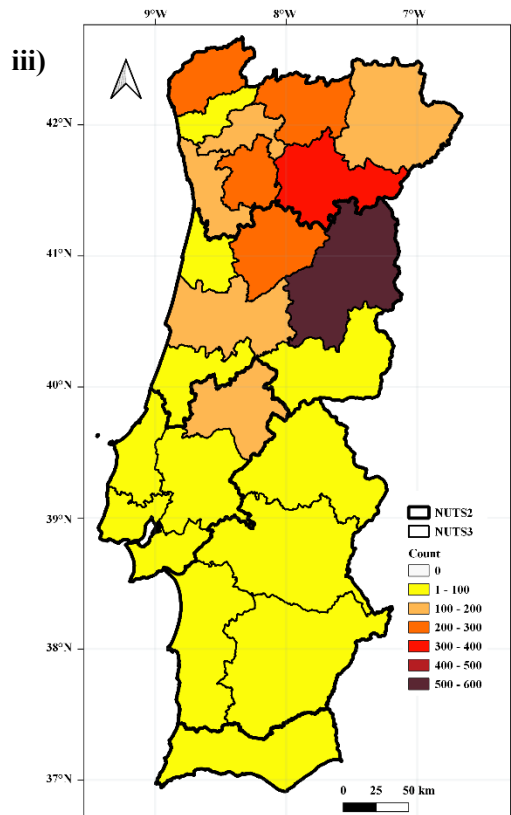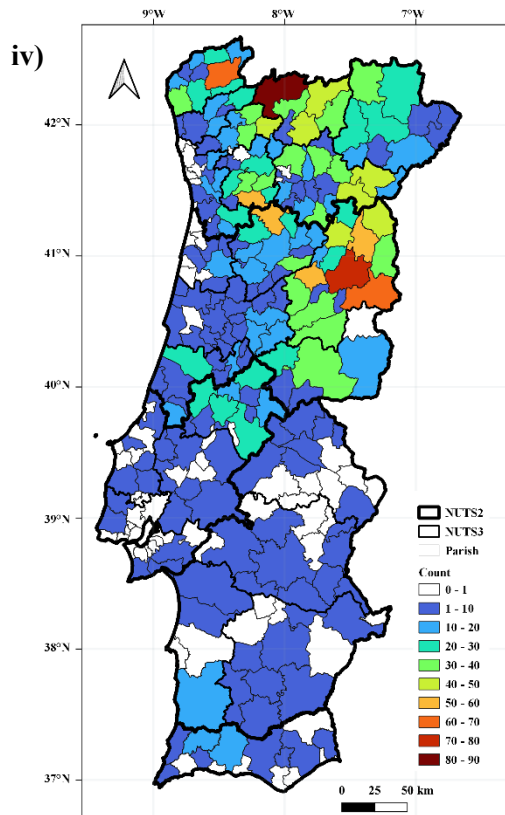

Figure A1 – Fire frequency of fires within parishes and districts of Portugal are presented. In panel i) and ii) of this figure, the fire frequency of all fires burned throughout the years regardless of their size and with and/or without dates recorded are presented within “Nomenclature of Territorial Units for Statistics” level 2 (NUTS2) demonstrating Portugal’s districts and Portugal’s parishes, respectively. Panels iii) and iv) demonstrate the fire frequency of valid fires, i.e., fires larger than 500 ha for pre-2000 and larger than 100 ha for post-2001 with start and dates recorded, within Portugal’s districts and parishes, respectively.

## Reviewer #2

The data article provides a new dataset to potentially evaluate fire severity in Portugal in the period 1984-2022. This new dataset is a contribution to the analysis of fire severity in Portugal in the last decades. However, there are a series of limitations in the dataset that must be addressed prior to its publication:

The authors select fires larger than 500 ha for the period 1984-2000 to assess fire severity and fires larger than 100 ha for the remaining period, until 2022. The authors must justify the selection of these fire sizes and express in the methodology the percentage that these fires represent for Portugal in terms of number of fires as compared to the total number of fires in the country, and in terms of burnt area, as compared to the total burnt area in the country for all the years of the analysis. Fires larger than 100 ha are probably below 1% of the total number of fires, although they may have a larger contribution in terms of burnt area, maybe about 30-40%? These basic statistics are needed to know how representative the fire severity dataset is for Portugal.

On the basis of the above and the availability of satellite imagery from Landsat sensors, the authors must justify the selection of the 500 ha and 100 ha thresholds. In principle and given that the imagery is at 30 m spatial resolution, there is no obvious justification for the selection of these thresholds. Please, explain also why MODIS was used for 2012, which was a critical year of wildfires in Portugal and the potential inter-calibration (comparability) of the fire severity series for the rest of the years with the data obtained for 2012.

We thank the reviewer for their feedback.

As stated by Divisão de Defesa da Floresta Contra Incêndios (DGRF), (2006) and Fernandes, (2009), historically in Portugal, fires equal to and larger than 100ha correspond to 1% of numbers of fires while accounting for 75% of total burned extent. This point is mentioned in the subsection “2.1 Fire data” in lines 129 and 131. Hence, we set our fire size equal to or larger than 100ha. However, aside from the fire size, it was important that the fires considered for burn severity estimation had their start and end dates recorded as burn severity estimates without knowing dates will not make sense and also as our main objective was to provide the burn severity estimates for fires with the lowest time lag, i.e., minimum difference in unit of days between fire dates and the image acquisition dates. Unfortunately, for the period of 1984 to 2000, due to lack of accurate fire data, we were unable to find the dates for fires between 100ha and 500ha and the majority of fires (98.6%) within this time period with their dates recorded were equal to or larger than 500ha. So, for the period of 1984 to 2000, mainly fires equal to or larger than 500ha have their burn severity estimates provided in our atlas. This point is mentioned in the sub-section “2.1 Fire data” in lines 146 and 147. We called this subset of fires “valid fires” which correspond to fires with start and end dates recorded and their size equal to and larger than 500 ha for the duration of 1984 to 2000 and equal to and larger than



100ha for the duration of 2001 to 2022. We have provided such statistics within the “methodology” section of our manuscript in the sub-section 2.1 Fire data in lines 158 and 162. Moreover, as stated by Alvares et al., 2024, fires  $\geq 500$  ha, in Spain with similar environmental and climatic conditions to Portugal, are more likely to reflect significance of burn severity. Hence, for conducting any future burn severity analysis, which is highly encouraged by us, this size threshold is not a limitation.

Regarding the selection of MODIS imagery for 2012, it was only due to the fact that for the year 2012 only Landsat sensor available (according to Landsat availability dates summarized in Table 1) is Landsat-7 ETM+ imagery. However, as mentioned in the sub-section “2.2 RS imagery: access and processing” in lines 176 to 177, this sensor suffered a technical failure in its scan line corrector (SLC) in May 2003 with multiple gaps within its imagery since then. Our explanatory analysis showed that for 2012 if we have used Landsat-7 ETM+ imagery, because of multiple gaps, we would have lost 52% of area burned in 2012 with no burn severity estimation. Hence to have “temporal coherency”, for this year, we provided the burn severity estimates with imagery from MODIS.

Regarding “potential inter-calibration (comparability)” of burn severity estimates of 2012 with spatial resolution of 500m with burn severity estimates of other years with spatial resolution of 30m, according to Alonso-González, E and Fernández-García, V (2021), the burn severity estimates from Landsat and MODIS are comparable and their method of evaluating comparability can be applied. This point is added to “Discussion” section within the lines 449 to 451. The added point is:

According to by Alonso-González and Fernández-García, 2021, the burn severity estimates obtained by Landsat and MODIS are comparable despite the big difference in their resolution and to evaluate their comparability, their developed methods can be applied (Alonso-González and Fernández-García, 2021).

The statement on the use of the DNBR-EVI regarding the potential use of this index based on the analysis of 3 fires, only, should be excluded from the article as the representativity of this analysis is not acceptable by any scientific standards. The authors are encouraged to continue the testing of this index with a sufficiently large/representative dataset.

We thank the reviewers for their feedback. This point is removed in the revised version.
